# Supplementary material for: Soil Bacteria Isolated From Tunisian Arid Areas Show Promising Antimicrobial Activities Against Gram-Negatives
Source: Front Microbiol. 2018 Nov 13;9:2742. doi: 10.3389/fmicb.2018.02742 (PMC6242944; doi:10.3389/fmicb.2018.02742)
Supplement: Supplementary file 1 [file Data_Sheet_1.docx]

Supplementary Material

Soil Bacteria Isolated from Tunisian Arid Areas Show Promising Antimicrobial Activities against Gram-Negatives

Zina Nasfi1,2,3, Henrik Busch4, Stefan Kehraus4, Luis Linares-Otoya2, Gabriele M. König4, Till F. Schäberle2,5*, Rafik Bachoual1

1Laboratory of Plant Improvement and Valorization of Agroresources, National School of Engineering of Sfax, Sfax, Tunisia

2Institute for Insect Biotechnology, Justus-Liebig-University Giessen, Giessen, Germany

3Faculty of Sciences of Gabès, University of Gabès, Tunisia

4Institute for Pharmaceutical Biology, University of Bonn, Bonn, Germany

5Department of Bioresources of the Fraunhofer Institute for Molecular Biology and Applied Ecology, Giessen, Germany

*** Correspondence:**
till.f.schaeberle@agrar.uni-giessen.de

# Supplementary Figures and Tables

- 1. **Supplementary Figures**

##
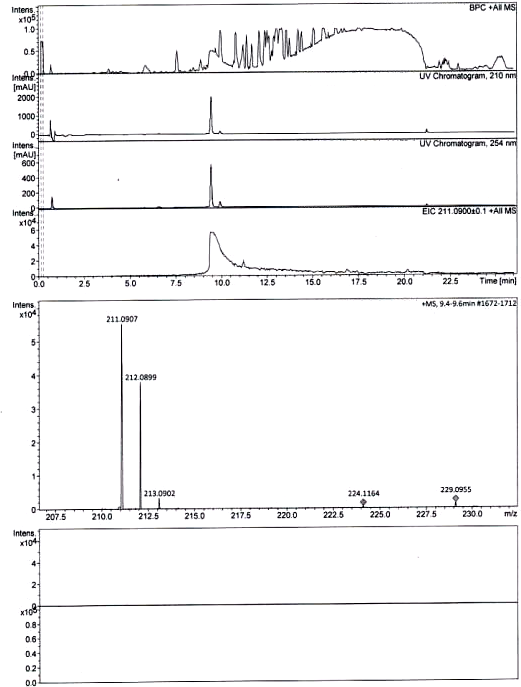


##

**Supplementary Figure 1.** LC-MS mass spectrum of the bioactive compound 1-acetyl-β-carboline produced by *Bacillus* sp. M21a.

(A)

**
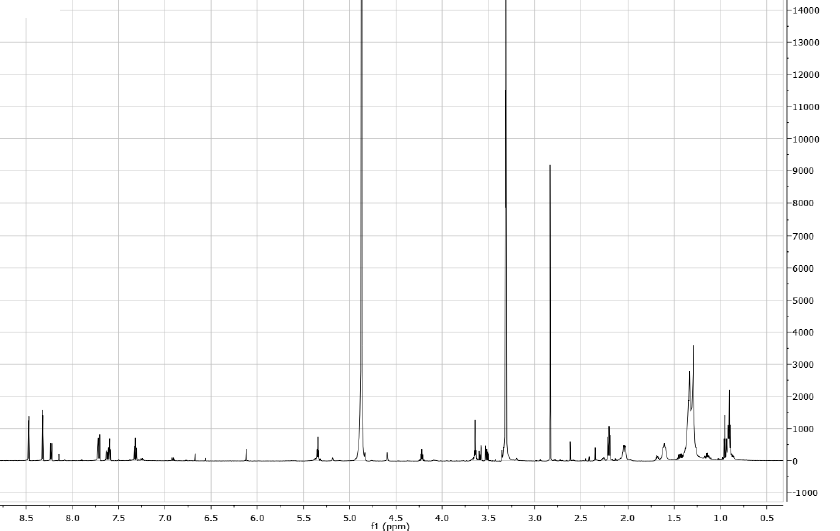
**

(B)

**
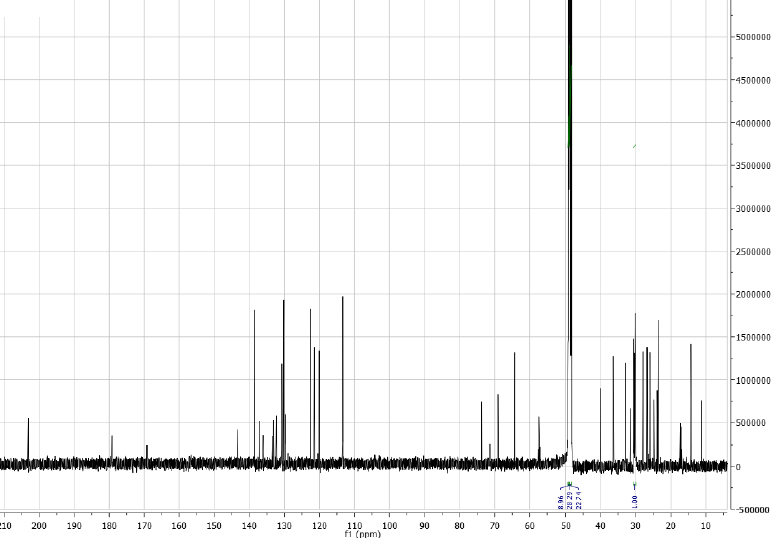
**

(C)

**
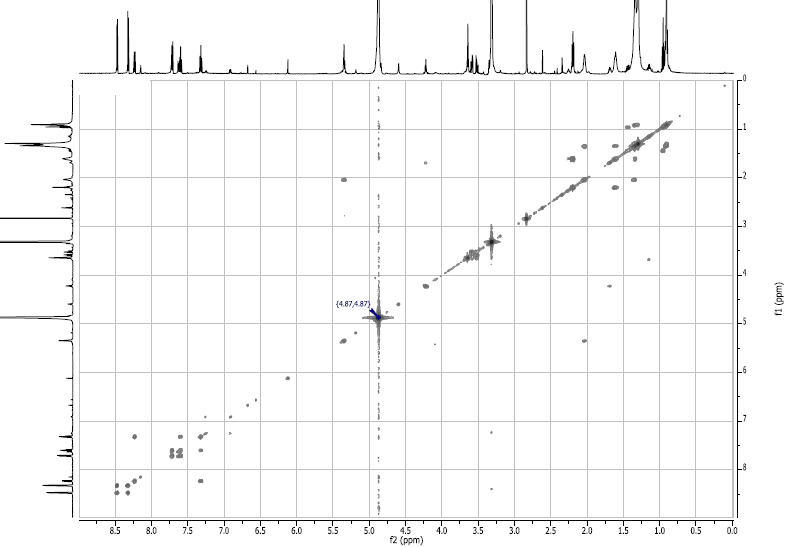
**

(D)

**
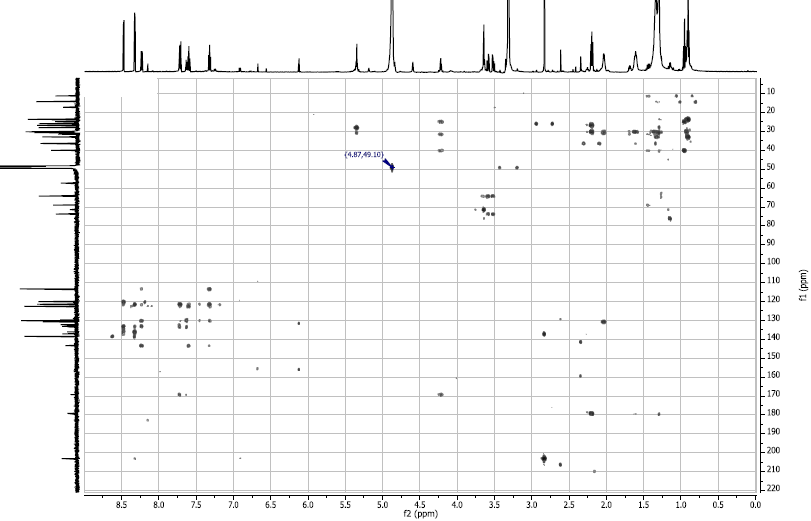
**

**Supplementary Figure 2.** NMR data of the bioactive compound 1-acetyl-β-carboline produced by *Bacillus* sp. M21a. (A) 1H-NMR spectrum, (B) 13C-NMR spectrum, (C) 1H-1H COSY spectrum, (D)1H-13C HMBC spectrum.

(A)


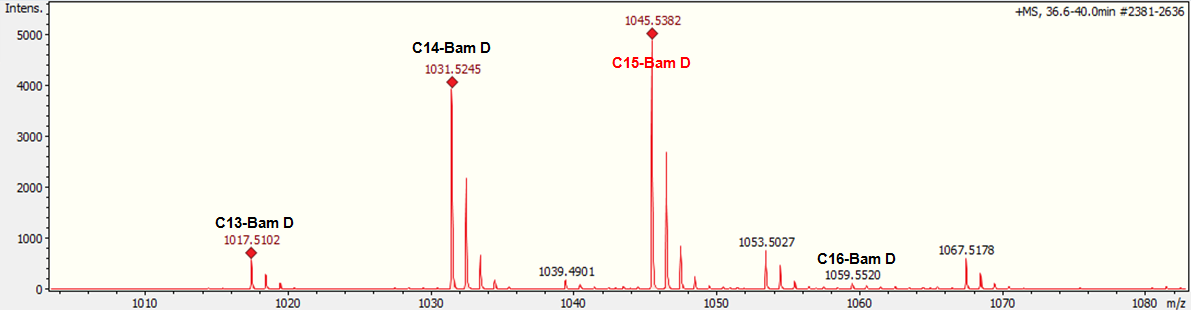


(B)


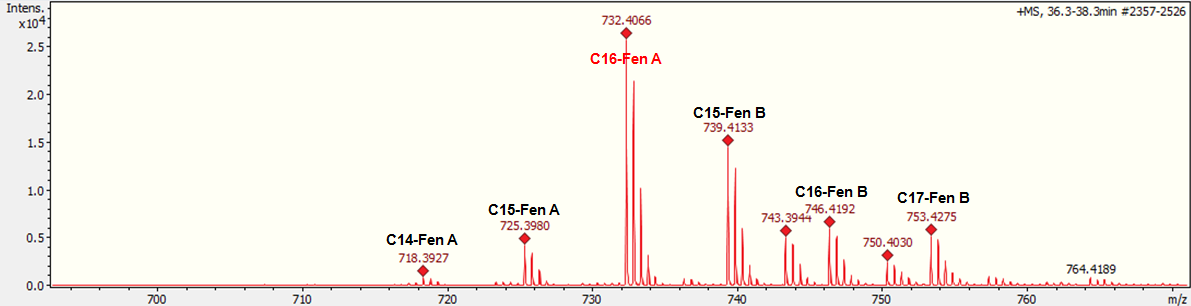


(C)


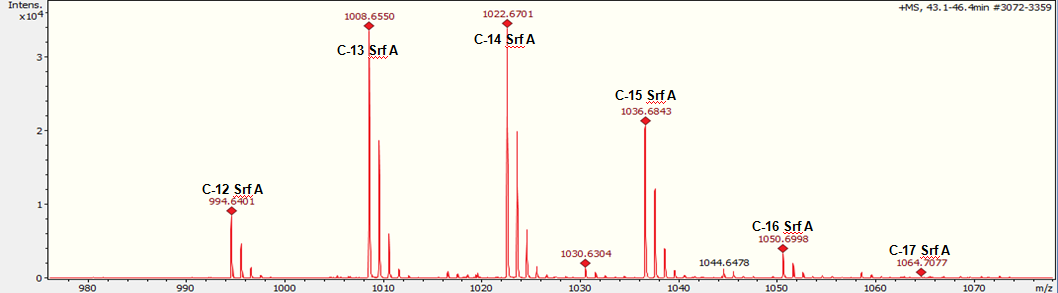


**Supplementary Figure 3.** LC-MS spectra of bioactive lipopetides from the methanolic extract from a solid cultivation of *Bacillus* sp. M21a. (A) Mass spectra corresponding to the bacillomycin D homolog, (B) Mass spectra corresponding to the fengycin homolog, (C) Mass spectra corresponding to the surfactin homolog.


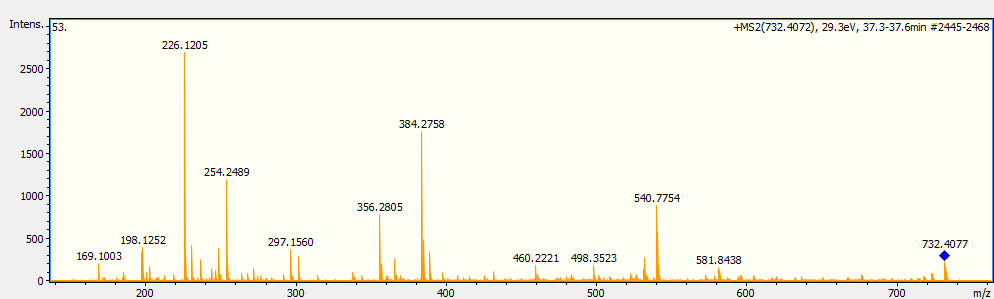

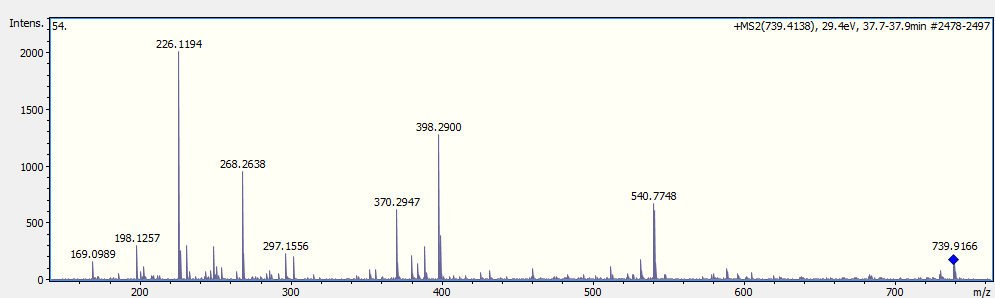

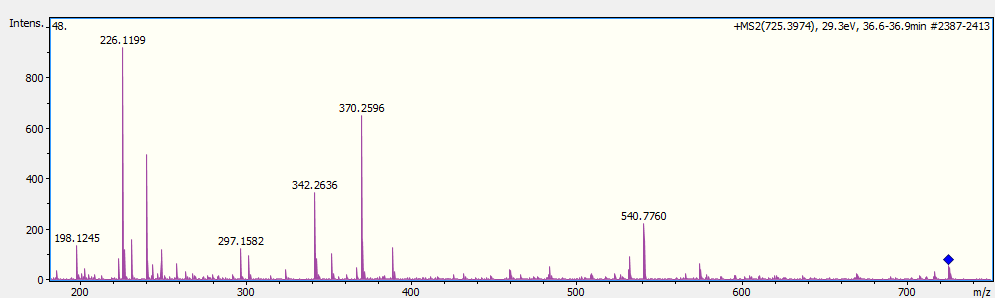

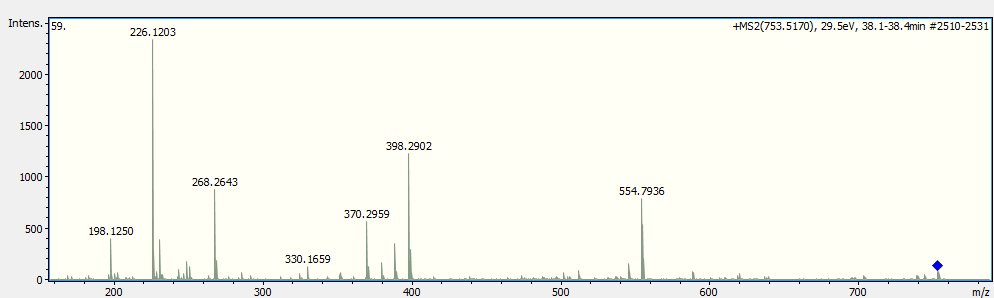


**Supplementary Figure 4.** MS/MS spectrum of the fengycin precursors, **A** C15-Fen A precursor ion [M + 2H]2+ at *m/z* 725.3974, **B** C16-Fen A precursor ion [M + 2H]2+ at *m/z* 732.4072, **C** C15-Fen B precursor ion [M + 2H]2+ at *m/z* 739.4138, **D** C17-Fen B precursor ion [M + 2H]2+ at *m/z* 753.5170

(A)

**
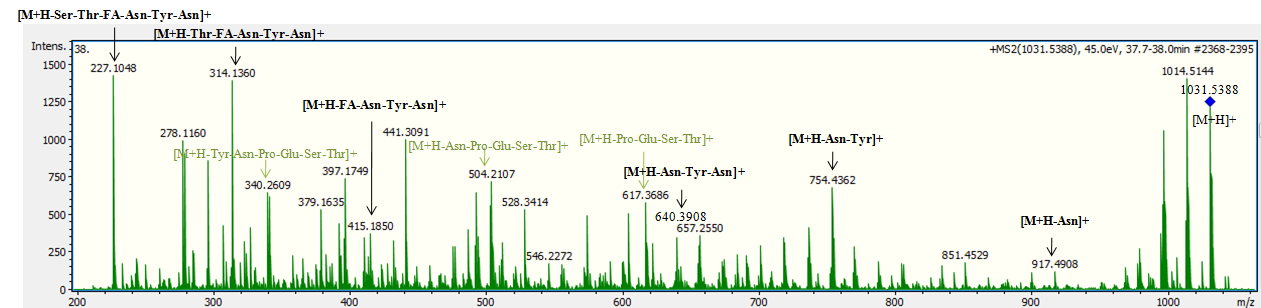
**

(B)

**
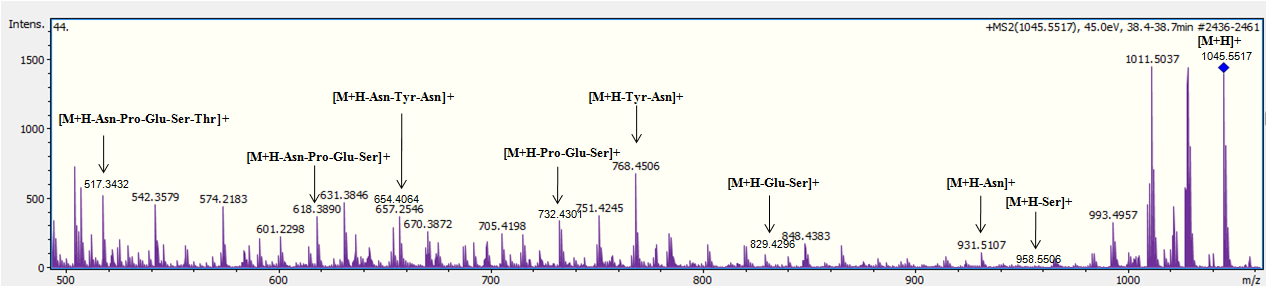
**

(C)

**
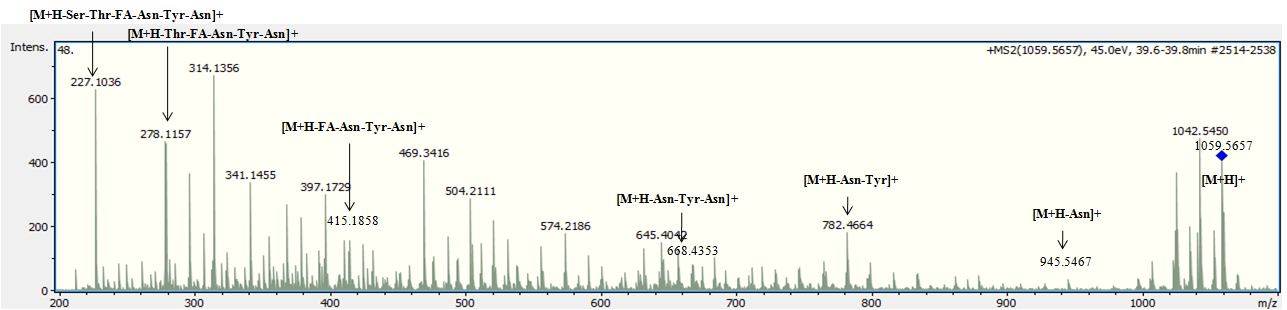
**

**Supplementary Figure 5.** MS/MS spectrum of the bacillomycin D precursors, **A** Bam D precursor ion [M + H]+ at *m/z* 1031 for C14-Bam D, **B** Bam D precursor ion [M + H]+ at *m/z* 1045 for C15-Bam D, **C** Bam D precursor ion [M + H]+ at *m/z* 1059 for C16-Bam D.

(A)
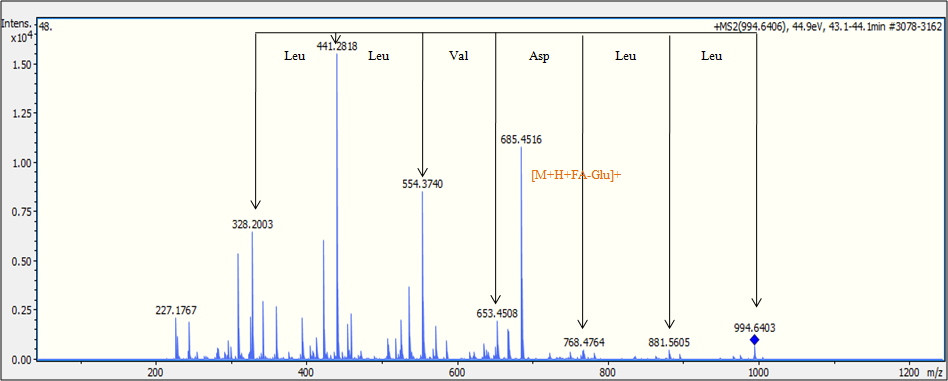


(B)
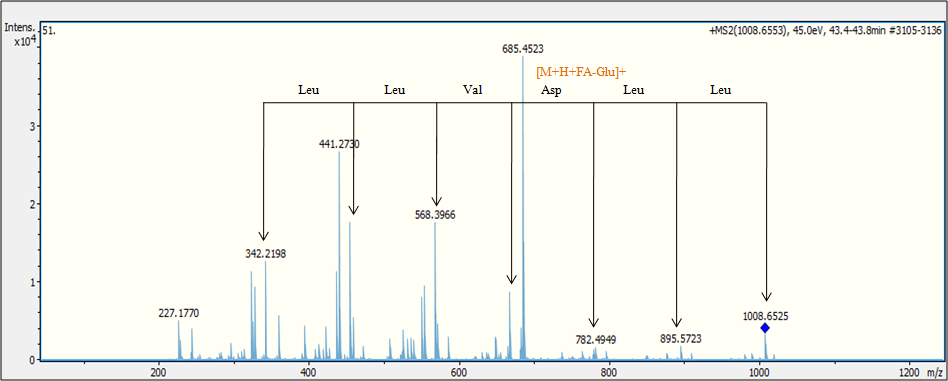


(C)
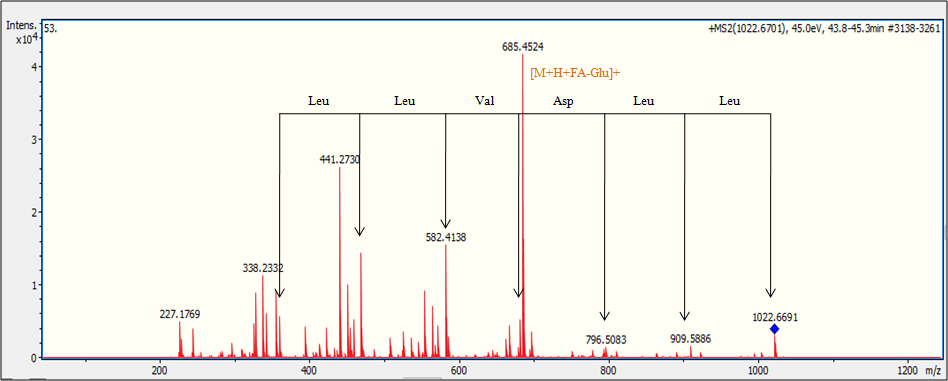


(D)
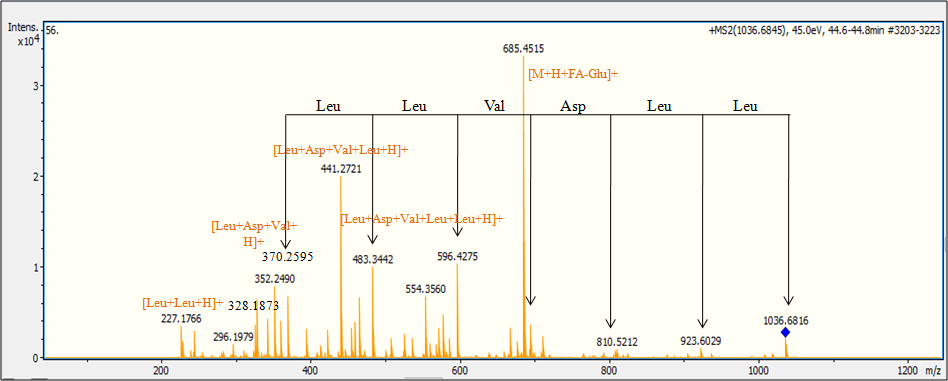


(E)
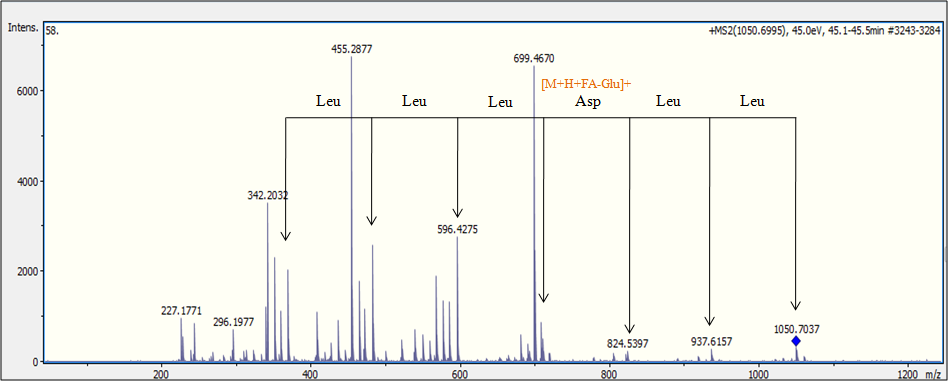


(F)
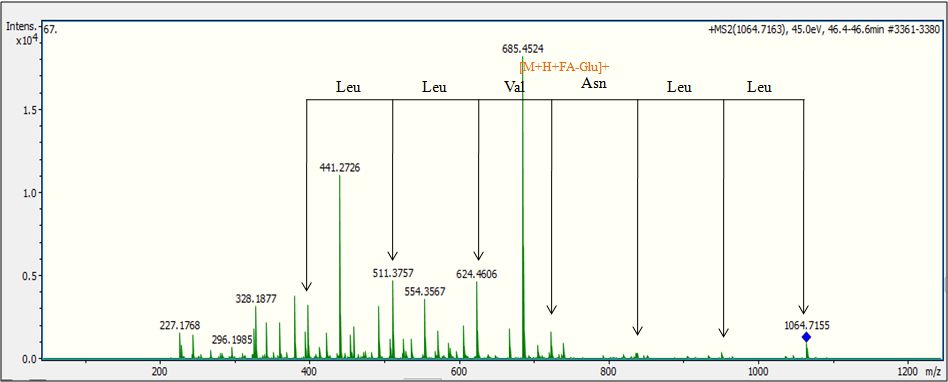


**Supplementary Figure 6.** MS/MS spectrum of the surfactin precursors and fragmentation proposal, **A** Surfactin precursor ion [M + H]+ at *m/z* 994 for C12-Srf A, **B** Surfactin precursor ion [M + H]+ at *m/z* 1008 for C13-Srf A, **C** Surfactin precursors ion [M + H]+ at *m/z* 1022 for C14-Srf A, **D** Surfactin precursor ion [M + H]+ at *m/z* 1036 for C15-Srf A, **E** Surfactin precursor ion [M + H]+ at *m/z* 1050 for C16-Srf A, and **F** Surfactin precursor ion [M + H]+ at *m/z* 1064 for C17-Srf A

## Supplementary Tables

**Supplementary Table1.** Antibacterial activity of the selected soil isolates against several test bacteria.

|  | **Gram Negative Bacteria** | | | | | | | | | | | | | | | **Gram Positive Bacteria** | | | | | | |
| --- | --- | --- | --- | --- | --- | --- | --- | --- | --- | --- | --- | --- | --- | --- | --- | --- | --- | --- | --- | --- | --- | --- |
| Strain | ***E. coli* ATCC25922** | ***E. coli* ATCC35218** | ***E. coli* KL.16** | ***E. coli* KL16.2a** | | ***E. coli* MA isolate** | | ***E. coli* isolate** | | ***S. typhi*isolate** | | ***S. typhi*isolate** | | ***S aureus* ATCC29213** | | | ***S. epidermidis*** | | ***S. saprophyticus*** | | ***S. aureus* isolate** | |
| **B1** | 13,33 ± 1,15 | 14 ± 0 | 12,33 ± 0,57 | 11,66 ± 0,57 | | 10 ± 0 | | - | | ND | | ND | | 19,66 ± 2,08 | | | 19 ± 1 | | 15,33 ± 0,57 | | - | |
| **C2** | - | - | - | - | | - | | - | | - | | - | | 9 ± 0 | | | 8,33 ± 0,57 | | - | | - | |
| **C5** | 13 ± 0,57 | 12,66 ± 1,52 | 11,66 ± 0,57 | 11,66 ± 1,15 | | 9 ± 0 | | - | | 16,33 ± 0,57 | | 16 ± 0 | | 12,66 ± 0,57 | | | 12,66 ± 1,52 | | 13,66 ± 1,52 | | - | |
| **C6** | 14,33 ± 0,57 | 15,33 ± 0,57 | 15 ± 0 | 14 ± 0 | | 12,33 ± 0,57 | | - | | 17 ± 1,73 | | 16,33 ± 1,15 | | 12,66 ± 1,52 | | | 11 ± 1 | | 12,33 ± 1,15 | | - | |
| **C7** | 11,66 ± 1,52 | 12,66 ± 1,15 | 10,66 ± 0,57 | 10,66 ± 0,57 | | 9,33 ± 1,15 | | - | | 14,33 ± 1,52 | | 14,66 ± 0,57 | | 13,33 ± 0,57 | | | 12,33 ± 1,15 | | 13 ± 1 | | - | |
| **C11** | 10,66 ± 1,52 | 12,33 ± 1,52 | 11 ± 0 | 10 ± 0 | | 9 ± 0 | | - | | 13,66 ± 1,52 | | 14 ± 0 | | 14 ± 0 | | | 13,66 ± 1,15 | | 14,66 ± 1,52 | | - | |
| **C14** | 10,66 ± 0,57 | - | 9,66 ± 0,57 | 9 ± 0 | | 8 ± 1 | | - | | - | | - | | 9,66 ± 0,57 | | | 8,66 ± 0,57 | | - | | - | |
| **C17** | 13 ± 0 | - | 11,66 ± 1,52 | 12 ± 1 | | 10,66 ± 0,57 | | - | | - | | - | | 13,33 ± 0,57 | | | 14 ± 0 | | 11 ± 1 | | - | |
| **C18** | 14,33 ± 1,15 | 12,66 ± 1,15 | 12,33 ± 1,15 | 12,66 ± 1,15 | | 10,33 ± 1,15 | | - | | - | | - | | 17,33 ± 1,15 | | | 15,66 ± 0,57 | | 15,66 ± 0,57 | | - | |
| **C20** | 13,33 ± 1,15 | 14 ± 1 | 12,33 ± 0,57 | 12 ± 0 | | 10,33 ± 0,57 | | - | | - | | - | | 15,33 ± 0,57 | | | 13,33 ± 0,57 | | 17,66 ± 0,57 | | - | |
| **C21** | 14,33 ± 0,57 | 15,33 ± 0,57 | 13,66 ± 1,15 | 12,66 ± 1,52 | | 10 ± 0 | | - | | - | | - | | 16 ± 1,73 | | | 14 ± 1 | | 17,66 ± 1,52 | | - | |
| **C22** | 15,33 ± 0,57 | 16 ± 0 | 14,33 ± 1,52 | 13,66 ± 0,57 | | 11,33 ± 0,57 | | - | | - | | - | | 15,66 ± 0,57 | | | 13,66 ± 1,15 | | 17,33 ± 1,52 | | - | |
| **C23** | 14,66 ± 1,52 | 15,66 ± 1,15 | 14 ± 1 | 13 ± 0 | | 11,66 ± 0,57 | | - | | - | | - | | 17,66 ± 0,57 | | | 16 ± 1 | | 16,66 ± 1,15 | | - | |
| **C24** | 15 ± 0 | 16,66 ± 0,57 | 12,66 ± 1,15 | 12,33 ± 0,57 | | 11 ± 1 | | - | | - | | - | | 16 ± 0 | | | 15,66 ± 1,52 | | 16,66 ± 1,52 | | - | |
| **C25** | 15,66 ± 0,57 | 16,33 ± 0,57 | 14 ± 0 | 13,33 ± 0,57 | | 10,66 ± 1,15 | | - | | - | | - | | 16,66 ± 0,57 | | | 15 ± 1,73 | | 15,66 ± 1,52 | | - | |
| **C26** | 14,66 ± 0,57 | 15 ± 1 | 13,66 ± 0,57 | 13,66 ± 0,57 | | 10,66 ± 1,52 | | - | | - | | - | | 17,33 ± 2,08 | | | 15,66 ± 1,52 | | 17,33 ± 1,52 | | - | |
|  | **Gram Negative Bacteria** | | | | | | | | | | | | | | | **Gram Positive Bacteria** | | | | | | | |
|  | ***E. coli* ATCC25922** | ***E. coli* ATCC35218** | ***E. coli* KL.16** | | ***E. coli* KL16.2a** | | ***E. coli* MA isolate** | | ***E. coli* isolate** | | ***S. typhi*isolate** | | ***S. typhi*isolate** | | ***S aureus* ATCC29213** | | | ***S. epidermidis*** | | ***S. saprophyticus*** | | ***S. aureus* isolate** | |
| **M2** | 12 ± 2 | - | 10,66 ± 0,57 | | 11 ± 1 | | 9,33 ± 0,57 | | - | | 12 ± 1 | | 11,33 ± 0,57 | | 14,66 ± 1,15 | | | 14 ± 0 | | 17,66 ± 1,52 | | - | |
| **M21a** | 17,66 ± 1,52 | 12 ± 1 | 15,33 ± 0,57 | | 16,33 ± 1,52 | | 13,33 ± 1,52 | | - | | 12,66 ± 0,57 | | 11 ± 0 | | 22,66 ± 1,15 | | | 19,66 ± 2,08 | | 18,33 ± 2,08 | | - | |
| **M22** | 13,66 ± 1,52 | - | 12 ± 0 | | 12,66 ± 1,15 | | 10 ± 1,73 | | - | | - | | - | | 13,66 ± 1,15 | | | 11,66 ± 1,15 | | 14 ± 0 | | - | |
| **M27** | 12 ± 1 | - | 10 ± 0 | | 10,66 ± 1,15 | | 8,33 ± 0,57 | | - | | - | | - | | 12 ± 0 | | | 11,33 ± 1,52 | | - | | - | |
| **M28** | 11 ± 1,73 | - | 10,66 ± 0,57 | | 10,33 ± 0,57 | | 9 ± 0 | | - | | - | | - | | 11,66 ± 0,57 | | | 10,66 ± 2,08 | | - | | - | |
| **M32** | 8,33 ± 0,57 | 10,66 ± 1,15 | 8 ± 0 | | 8 ± 0 | | 7,33 ± 0,57 | | - | | 14 ± 1 | | 13,33 ± 0,57 | | 12 ± 1,73 | | | 14 ± 0 | | 12,33 ± 0,57 | | - | |
| **M77** | 14,33 ± 1,52 | 14 ± 1 | 14,66 ± 0,57 | | 15 ± 1 | | 12,66 ± 0,57 | | - | | 15,33 ± 1,15 | | 14,66 ± 0,57 | | 16 ± 2,64 | | | 19 ± 1 | | 14,66 ± 0,57 | | - | |
| **M79** | 14,66 ± 0,57 | 14 ± 1,73 | 15 ± 1 | | 14,66 ± 0,57 | | 12 ± 1 | | - | | 15,33 ± 0,57 | | 15,33 ± 1,15 | | 14 ± 0 | | | 17,33 ± 1,15 | | 14,66 ± 1,52 | | - | |
| **M98** | 11,66 ± 2,3 | - | 11,66 ± 0,57 | | 12,33 ± 0,57 | | 7 ± 0 | | - | | - | | - | | 12,33 ± 0,57 | | | 10,33 ± 0,57 | | - | | - | |
| **M101** | 13 ± 1 | - | 12,33 ± 0,57 | | 12,66 ± 0,57 | | 10,33 ± 0,57 | | - | | - | | - | | 10,33 ± 0,57 | | | 10 ± 0 | | - | | - | |
| **M117** | 14,66 ± 0,57 | - | 14 ± 1 | | 13,33 ± 1,52 | | 12 ± 0 | | - | | - | | - | | 11,33 ± 0,57 | | | 10,33 ± 1,15 | | - | | - | |
| **M124** | 16,33 ± 1,52 | 15,33 ± 1,15 | 15,66 ± 1,15 | | 16,66 ± 1,52 | | 14,66 ± 0,57 | | - | | 15,66 ± 0,57 | | 15,66 ± 1,15 | | 22,33 ± 0,57 | | | 18,33 ± 1,52 | | 17 ± 1 | | - | |

**Supplementary Table 2.** Characteristics of the bioactive bacterial isolates.

|  | **Morphology** | **Motility** | **Arrangement** | **Spores** | **Gram reaction** |
| --- | --- | --- | --- | --- | --- |
| B1, C5, C7, C11, M21a, M77, M79, M124 | Dry creamy irregular colonies with undulate edges | + | Pairs or chains | Terminal | + |
| C2 | Slimy white circular colonies with entire edges | - | Long chains | Terminal | + |
| C6 | Yellow to brown dry and adherent colonies with elevated ridges | + | Singles | - | - |
| C14 | Creamy large irregular colonies | + | Singles or pairs | Central | + |
| C17, C18, C21, C22, C23, C24, C25, C26 | Slightly yellowish, smooth and irregular colonies | + | Singles or pairs | Terminal | + |
| C20 | White with irregular margins | - | Long chains | - | + |
| M2, M27, M28, M98 | Mucoid creamy colonies with irregular borders | - | Very long chains | Central or terminal | + |
| M21, M22, M101, M117 | White irregular colonies with undulate edges | - | Pairs or chains | Terminal | + |
| M32 | White irregular colonies with a characteristic odor | - | Singles or pairs | - | + |

**Supplementary Table 3.**Composition of culture media tested for antibiotic production by *Bacillus* sp. M21a against *B. megaterium* and *E. coli*.

| **Culture medium** | **Medium composition (g/L)** | | **Reference** | ***B. megateriuma*** | ***E. colia*** |
| --- | --- | --- | --- | --- | --- |
| **LB** | Peptone | 10 | Liu et al., 2015 | + | + |
| Yeast extract | 5 |
| NaCl | 10 |
| **M1** | Glucose | 2.5 | Liu et al., 2015 | + | - |
| Tryptone | 17 |
| Phytone | 3 |
| NaCl | 5 |
| **M2** | Glucose | 1 | Liu et al., 2015 | + | - |
| Peptone | 1.5 |
| Yeast extract | 3 |
| NaCl | 6 |
| **M3** | Tryptone | 6 | Liu et al., 2015 | + | - |
| Yeast extract | 3 |
| CaCl2 | 0.38 |
| **M4** | Glucose | 0.5 | Gulhane et al., 2014 | + | - |
| citric acid | 1 |
| MgSO4 | 0.2 |
| MnSO4 | 0.01 |
| KH2PO4 | 0.5 |
| K2HPO4 | 0.5 |
| FeSO4 | 0.01 |
| **M5** | Chitin | 0.1 | Gomashe et al., 2014 | + | - |
| **(Minimal medium)** | KH2PO4 | 0.01 |
|  | MgSO4.7H2O | 0.005 |
| **M6** |  |  |  |  |  |
|  | Peptone | 5 | Uddin et al., 2013 | + | - |
|  | Meat extract | 3 |  |  |  |
|  | NaCl | 5 |  |  |  |
| **M7** | Glucose | 0.1 | Uddin et al., 2013 | + | - |
| Yeast extract | 0.02 |
| NaCl | 0.05 |
| **M8** | Peptone | 0.025 | Uddin et al., 2013 | - | - |
| Meat extract | 0.075 |
| NaCl | 0.15 |
| KCl | 0.1 |
| MgCl2 | 0.1 |
| FeSO4 | 0.1 |
| **M9** | Glucose | 0.1 | Uddin et al., 2013 | + | - |
| NaCl | 0.05 |
| **M10** | Sucrose | 10 | Beric et al., 2012 | + | - |
| Peptone | 10 |
| **M11** | Glucose | 10 | Vijayalakshmi et al., 2011 | + | - |
| Triammonium citrate | 2.5 |
| MgSO4 | 0.2 |
| MnSO4 | 0.2 |
| **M12** | Glucose | 20 | Youcef Ali et al., 2004 | + | - |
| Peptone | 10 |
| Yeast extract | 10 |
| **M13** | Sucrose | 20 | Jacques et al., 1999 | + | - |
| Peptone | 30 |
| Yeast extract | 7 |
| KH2PO4 | 1.9 |
| Trace element solution | 1 mL/L |

aA (+) indicates if activity of the crude extract was observed against the test strain, (-): no activity.

**Supplementary Table 4.**1H and 13C NMR data, 1H–1H COSY, and HMBC correlations for the antibacterial compound of *Bacillus* sp. M21a.

| **Position** | **δH [ppm], *J*** | **mult.** | **δC [ppm]** | **1H - 1H COSY** | **1H - 13C HMBC** |
| --- | --- | --- | --- | --- | --- |
| 1 | 7.32 (ddd, *J* = 7.9, 7.1, 1.0 Hz, 2H) | CH | 129.78 | 2;6 | 2; 3; 5 |
| 2 | 7.61 (m, 2H) | CH | 130.162 | 1;3 | 4; 6 |
| 3 | 7.71 (m, 2H) | CH | 113.355 | 2 | 1; 5 |
| 4 |  | C | 143.329 |  | 2; 6 |
| 5 |  | C | 121.466 |  | 11 |
| 6 | 8.23 (dt, *J* = 7.9, 1.0 Hz, 1H) | CH | 122.528 | 1 | 2;4 |
| 7 |  | C | 132.264 |  | 11 |
| 8 |  | C | 130.738 |  | 6 |
| 9 |  | C | 137.133 | 11 | 10 |
| 10 | 8.47 (d, *J* = 4.9 Hz, 1H) | CH | 138.474 | 10 | 8;9 |
| 11 | 8.32 (d, *J* = 5.0 Hz, 1H) | CH | 120.12 |  | 5;7 |
| 12 |  | C | 203.078 |  |  |
| 13 | 2.83 (s) | CH3 | 25.946 |  | 9 |

**References**

Berić, T., Kojić, M., Stanković, S., Topisirović, L., Degrassi, G., Myers, M., ...and Fira, D. (2012). Antimicrobial activity of *Bacillus* sp. natural isolates and their potential use in the biocontrol of phytopathogenic bacteria. *Food Technology and Biotechnology*, *50*(1), 25-31.

Gomashe, A. V., Sharma, A. A., and Wankhede, M. A. (2014). Screening and Evaluation of Antibacterial Activity of Bacteriocin Producing LAB against some Selected Bacteria Causing Food Spoilage. *Int. J. Curr. Microbiol. App. Sci*, *3*(8), 658-665.

Gulhane, P. A., Gomashe, A. V., and Lade, S. (2014). Optimization of Bacitracin Production from *Bacillus licheniformis* NCIM 2536. *Int. J. Curr. Microbiol. App. Sci*, *3*(9), 819-829.

Jacques, P., Hbid, C., Destain, J., Razafindralambo, H., Paquot, M., De Pauw, E., &Thonart, P. (1999). Optimization of biosurfactant lipopeptide production from *Bacillus subtilis* S499 by Plackett-Burman design. In *Twentieth Symposium on Biotechnology for Fuels and Chemicals* (pp. 223-233). Humana Press, Totowa, NJ.

Liu, C., Sheng, J., Chen, L., Zheng, Y., Lee, D. Y. W., Yang, Y., ...and Shen, L. (2015). Biocontrol activity of *Bacillus subtilis* isolated from *Agaricusbisporus* mushroom compost against pathogenic fungi. *Journal of agricultural and food chemistry*, *63*(26), 6009-6018.

Uddin, M., Mahmud, N., Anwar, N. and Manchur, M. A. (2013). Bioactive metabolite production by *Streptomyces albolongus* in favourable environment. *Journal of Microbiology and Infectious Diseases*, *3*(02).

Vijayalakshmi, S., Kumar, V. and Thankamani, V. (2013). Optimization and cultural characterization of *Bacillus* RV. B2. 90 producing alkalophilic thermophilic protease. *Research Journal of Biotechnology*, *8*(5), 37-43.

Youcef-Ali, M., Chaouche, N. K., Dehimat, L., Bataiche, I., Mounira, K. A. R. A., Cawoy, H. E., and Thonart, P. (2014). Antifungal activity and bioactive compounds produced by *Bacillus mojavensis* and *Bacillus subtilis*. *African Journal of Microbiology Research*, *8*(6), 476-484.
